# Supplementary material for: How barefoot and conventional shoes affect the foot and gait characteristics in toddlers
Source: PubMed Central journal article supplement (PMC9398026; doi:10.1371/journal.pone.0273388), 2022-08-23
Supplement: pone.0273388.s001.pdf [file pone.0273388.s001.pdf]

| <b>Participant</b> | <b>gender</b> | <b>Body height<br/>1st data<br/>collection</b> | <b>Body mass<br/>1st data<br/>collection</b> | <b>Body height<br/>2nd data<br/>collection</b> | <b>Body mass<br/>2nd data<br/>collection</b> | <b>barefoot=0,<br/>non-<br/>barefoot=1</b> |
|--------------------|---------------|------------------------------------------------|----------------------------------------------|------------------------------------------------|----------------------------------------------|--------------------------------------------|
| Participant 1      | M             | 76,00                                          | 12,30                                        | 84,00                                          | 13,50                                        | 0                                          |
| Participant 2      | F             | 79,00                                          | 9,90                                         | 84,00                                          | 11,10                                        | 1                                          |
| Participant 3      | M             | 75,00                                          | 10,30                                        | 84,00                                          | 14,30                                        | 1                                          |
| Participant 4      | M             | 79,00                                          | 10,20                                        | 83,00                                          | 11,10                                        | 1                                          |
| Participant 5      | F             | 72,00                                          | 8,60                                         | 82,00                                          | 10,40                                        | 0                                          |
| Participant 6      | M             | 75,00                                          | 8,90                                         | 84,00                                          | 10,50                                        | 1                                          |
| Participant 7      | F             | 77,00                                          | 8,60                                         | 83,00                                          | 10,90                                        | 1                                          |
| Participant 8      | M             | 85,00                                          | 12,20                                        | 91,00                                          | 13,80                                        | 1                                          |
| Participant 9      | F             | 75,00                                          | 9,40                                         | 80,00                                          | 10,80                                        | 0                                          |
| Participant 10     | F             | 77,00                                          | 9,90                                         | 84,00                                          | 11,60                                        | 0                                          |
| Participant 11     | M             | 75,00                                          | 9,70                                         | 84,00                                          | 10,80                                        | 0                                          |
| Participant 12     | F             | 76,00                                          | 9,60                                         | 83,00                                          | 10,90                                        | 0                                          |
| Participant 13     | M             | 82,00                                          | 11,40                                        | 88,00                                          | 13,20                                        | 1                                          |
| Participant 14     | F             | 77,00                                          | 9,30                                         | 85,00                                          | 11,00                                        | 0                                          |
| Participant 15     | M             | 77,00                                          | 10,40                                        | 84,00                                          | 12,10                                        | 1                                          |
| Participant 16     | M             | 82,00                                          | 6,30                                         | 92,00                                          | 12,40                                        | 0                                          |
| Participant 17     | F             | 78,00                                          | 10,70                                        | 85,00                                          | 13,00                                        | 1                                          |
| Participant 18     | F             | 74,00                                          | 10,20                                        | 82,00                                          | 12,30                                        | 0                                          |
| Participant 19     | M             | 81,00                                          | 10,40                                        | 88,00                                          | 12,10                                        | 0                                          |
| Participant 20     | M             | 75,00                                          | 9,50                                         | 84,00                                          | 11,50                                        | 0                                          |
| Participant 21     | F             | 84,00                                          | 14,00                                        | 92,00                                          | 16,20                                        | 1                                          |
| Participant 22     | M             | 76,00                                          | 8,30                                         | 84,00                                          | 9,90                                         | 0                                          |
| Participant 23     | M             | 77,00                                          | 10,30                                        | 87,00                                          | 12,10                                        | 1                                          |
| Participant 24     | F             | 72,00                                          | 7,90                                         | 78,00                                          | 9,90                                         | 1                                          |
| Participant 25     | M             | 78,00                                          | 10,30                                        | 88,00                                          | 12,10                                        | 0                                          |
| Participant 26     | F             | 78,00                                          | 10,90                                        | 86,00                                          | 12,70                                        | 1                                          |
| Participant 27     | F             | 73,00                                          | 9,90                                         | 83,00                                          | 12,00                                        | 0                                          |
| Participant 28     | F             | 76,00                                          | 9,20                                         | 79,00                                          | 9,30                                         | 0                                          |
| Participant 29     | F             | 88,00                                          | 10,60                                        | 88,00                                          | 11,60                                        | 1                                          |
| Participant 30     | M             | 82,00                                          | 10,50                                        | 91,00                                          | 13,00                                        | 1                                          |

| <b>Data collection</b>   | <i>total left:<br/>Peak<br/>pressure<br/>(kPa)</i> | <i>total left:<br/>Contact<br/>area (2)</i> | <i>total left:<br/>Contact<br/>time (ms)</i> | <i>total left:<br/>Maximum<br/>force<br/>(normalized<br/>to BW)</i> | <i>total right:<br/>Peak<br/>pressure<br/>(kPa)</i> | <i>total right:<br/>Contact<br/>area (2)</i> |
|--------------------------|----------------------------------------------------|---------------------------------------------|----------------------------------------------|---------------------------------------------------------------------|-----------------------------------------------------|----------------------------------------------|
| <b>1.data collection</b> | 181,000                                            | 54,450                                      | 454,000                                      | 114,060                                                             | 146,000                                             | 55,650                                       |
| <b>1.data collection</b> | 142,000                                            | 46,450                                      | 518,000                                      | 107,980                                                             | 105,000                                             | 45,850                                       |
| <b>1.data collection</b> | 158,000                                            | 49,100                                      | 446,000                                      | 123,780                                                             | 120,000                                             | 46,350                                       |
| <b>1.data collection</b> | 121,000                                            | 50,250                                      | 568,000                                      | 117,400                                                             | 99,000                                              | 49,850                                       |
| <b>1.data collection</b> | 162,000                                            | 46,650                                      | 892,000                                      | 137,500                                                             | 195,000                                             | 44,200                                       |
| <b>1.data collection</b> | 110,000                                            | 49,000                                      | 610,000                                      | 121,340                                                             | 137,000                                             | 48,550                                       |
| <b>1.data collection</b> | 203,000                                            | 52,500                                      | 438,000                                      | 123,220                                                             | 182,000                                             | 54,250                                       |
| <b>1.data collection</b> | 147,000                                            | 57,350                                      | 636,000                                      | 123,200                                                             | 189,000                                             | 65,450                                       |
| <b>1.data collection</b> | 200,000                                            | 47,400                                      | 518,000                                      | 119,080                                                             | 203,000                                             | 45,700                                       |
| <b>1.data collection</b> | 87,500                                             | 42,500                                      | 597,500                                      | 117,875                                                             | 132,000                                             | 46,550                                       |
| <b>1.data collection</b> | 162,000                                            | 48,900                                      | 406,000                                      | 117,240                                                             | 190,000                                             | 51,200                                       |
| <b>1.data collection</b> | 121,000                                            | 51,500                                      | 468,000                                      | 128,520                                                             | 101,000                                             | 47,700                                       |
| <b>1.data collection</b> | 119,000                                            | 60,000                                      | 490,000                                      | 121,740                                                             | 129,000                                             | 58,900                                       |
| <b>1.data collection</b> | 170,000                                            | 51,150                                      | 364,000                                      | 126,540                                                             | 163,000                                             | 49,000                                       |
| <b>1.data collection</b> | 189,000                                            | 50,650                                      | 738,000                                      | 118,440                                                             | 205,000                                             | 54,600                                       |
| <b>1.data collection</b> | 70,000                                             | 46,500                                      | 742,000                                      | 190,760                                                             | 100,000                                             | 52,850                                       |
| <b>1.data collection</b> | 91,000                                             | 47,400                                      | 546,000                                      | 106,440                                                             | 149,167                                             | 48,042                                       |
| <b>1.data collection</b> | 132,000                                            | 47,550                                      | 414,000                                      | 144,360                                                             | 148,000                                             | 54,950                                       |
| <b>1.data collection</b> | 257,000                                            | 50,750                                      | 526,000                                      | 117,880                                                             | 182,000                                             | 54,300                                       |
| <b>1.data collection</b> | 103,000                                            | 41,200                                      | 398,000                                      | 112,820                                                             | 103,000                                             | 41,450                                       |
| <b>1.data collection</b> | 135,000                                            | 59,500                                      | 488,333                                      | 127,017                                                             | 172,000                                             | 64,050                                       |
| <b>1.data collection</b> | 208,000                                            | 50,550                                      | 442,000                                      | 143,200                                                             | 218,000                                             | 50,100                                       |
| <b>1.data collection</b> | 123,000                                            | 52,800                                      | 432,000                                      | 128,400                                                             | 103,000                                             | 52,200                                       |
| <b>1.data collection</b> | 134,000                                            | 41,150                                      | 684,000                                      | 120,240                                                             | 148,000                                             | 38,300                                       |
| <b>1.data collection</b> | 147,000                                            | 51,700                                      | 554,000                                      | 122,460                                                             | 212,000                                             | 52,800                                       |
| <b>1.data collection</b> | 163,000                                            | 49,800                                      | 416,000                                      | 137,480                                                             | 166,000                                             | 49,450                                       |
| <b>1.data collection</b> | 156,000                                            | 43,600                                      | 470,000                                      | 123,940                                                             | 111,000                                             | 44,500                                       |
| <b>1.data collection</b> | 186,000                                            | 48,250                                      | 402,000                                      | 131,260                                                             | 160,000                                             | 47,400                                       |
| <b>1.data collection</b> | 202,000                                            | 54,050                                      | 424,000                                      | 129,500                                                             | 142,000                                             | 51,950                                       |
| <b>1.data collection</b> | 142,000                                            | 55,000                                      | 440,000                                      | 111,320                                                             | 129,000                                             | 56,850                                       |

| <i>total right:<br/>Contact<br/>time (ms)</i> | <i>total right:<br/>Maximum<br/>force<br/>(normalized<br/>to BW)</i> | <i>hindfoot<br/>left:<br/>Contact<br/>time (p)<br/>(%ROP)</i> | <i>hindfoot<br/>left:<br/>Maximum<br/>force<br/>(normalized</i> | <i>hindfoot<br/>right:<br/>Contact<br/>time (p)<br/>(%ROP)</i> | <i>hindfoot<br/>right:<br/>Maximum<br/>force<br/>(normalized</i> | <i>midfoot<br/>left:<br/>Contact<br/>time (p)<br/>(%ROP)</i> | <i>midfoot<br/>left:<br/>Maximum<br/>force<br/>(normalized</i> |
|-----------------------------------------------|----------------------------------------------------------------------|---------------------------------------------------------------|-----------------------------------------------------------------|----------------------------------------------------------------|------------------------------------------------------------------|--------------------------------------------------------------|----------------------------------------------------------------|
| 432,000                                       | 115,700                                                              | 59,840                                                        | 58,220                                                          | 66,480                                                         | 57,900                                                           | 71,280                                                       | 52,200                                                         |
| 512,000                                       | 110,240                                                              | 71,080                                                        | 62,020                                                          | 63,020                                                         | 51,940                                                           | 82,840                                                       | 53,420                                                         |
| 490,000                                       | 104,460                                                              | 37,860                                                        | 65,100                                                          | 42,040                                                         | 40,600                                                           | 65,580                                                       | 58,560                                                         |
| 574,000                                       | 118,540                                                              | 66,820                                                        | 49,880                                                          | 69,120                                                         | 49,480                                                           | 82,220                                                       | 64,160                                                         |
| 802,000                                       | 128,080                                                              | 56,520                                                        | 52,360                                                          | 65,860                                                         | 71,520                                                           | 69,360                                                       | 54,960                                                         |
| 606,000                                       | 120,520                                                              | 64,940                                                        | 65,080                                                          | 63,280                                                         | 59,300                                                           | 77,160                                                       | 49,240                                                         |
| 418,000                                       | 134,880                                                              | 41,800                                                        | 68,680                                                          | 42,280                                                         | 82,220                                                           | 53,800                                                       | 53,800                                                         |
| 656,000                                       | 128,160                                                              | 74,560                                                        | 47,880                                                          | 61,640                                                         | 76,320                                                           | 77,280                                                       | 57,160                                                         |
| 582,000                                       | 125,680                                                              | 56,280                                                        | 69,340                                                          | 59,780                                                         | 70,280                                                           | 70,240                                                       | 47,880                                                         |
| 564,000                                       | 127,020                                                              | 70,175                                                        | 37,225                                                          | 65,180                                                         | 52,040                                                           | 86,575                                                       | 53,650                                                         |
| 450,000                                       | 126,160                                                              | 64,900                                                        | 60,160                                                          | 61,900                                                         | 66,840                                                           | 71,520                                                       | 46,700                                                         |
| 450,000                                       | 121,540                                                              | 64,060                                                        | 61,600                                                          | 64,960                                                         | 49,720                                                           | 81,200                                                       | 67,440                                                         |
| 480,000                                       | 117,700                                                              | 58,980                                                        | 46,160                                                          | 57,940                                                         | 56,720                                                           | 73,880                                                       | 57,380                                                         |
| 364,000                                       | 134,240                                                              | 53,280                                                        | 73,320                                                          | 51,460                                                         | 73,340                                                           | 66,420                                                       | 60,180                                                         |
| 728,000                                       | 116,960                                                              | 59,740                                                        | 55,000                                                          | 53,220                                                         | 47,560                                                           | 69,360                                                       | 38,240                                                         |
| 650,000                                       | 190,180                                                              | 70,620                                                        | 67,640                                                          | 57,800                                                         | 63,400                                                           | 83,840                                                       | 82,760                                                         |
| 503,333                                       | 105,667                                                              | 71,360                                                        | 45,720                                                          | 65,883                                                         | 38,300                                                           | 82,760                                                       | 53,760                                                         |
| 402,000                                       | 176,280                                                              | 55,160                                                        | 40,480                                                          | 44,500                                                         | 68,260                                                           | 81,420                                                       | 80,520                                                         |
| 548,000                                       | 118,920                                                              | 73,360                                                        | 71,840                                                          | 62,780                                                         | 66,660                                                           | 81,660                                                       | 63,640                                                         |
| 450,000                                       | 116,240                                                              | 62,680                                                        | 37,180                                                          | 63,280                                                         | 40,100                                                           | 81,900                                                       | 45,440                                                         |
| 476,000                                       | 136,420                                                              | 60,167                                                        | 63,717                                                          | 67,280                                                         | 73,680                                                           | 75,333                                                       | 67,250                                                         |
| 382,000                                       | 195,840                                                              | 52,900                                                        | 92,420                                                          | 51,160                                                         | 103,560                                                          | 68,080                                                       | 80,380                                                         |
| 452,000                                       | 132,680                                                              | 49,100                                                        | 51,920                                                          | 49,540                                                         | 49,740                                                           | 71,200                                                       | 52,220                                                         |
| 564,000                                       | 123,160                                                              | 30,980                                                        | 53,280                                                          | 43,920                                                         | 45,840                                                           | 68,460                                                       | 46,180                                                         |
| 548,000                                       | 123,920                                                              | 51,260                                                        | 47,860                                                          | 59,640                                                         | 55,580                                                           | 80,180                                                       | 63,220                                                         |
| 400,000                                       | 146,240                                                              | 58,100                                                        | 69,120                                                          | 59,320                                                         | 69,340                                                           | 72,020                                                       | 68,180                                                         |
| 470,000                                       | 116,960                                                              | 67,220                                                        | 47,920                                                          | 67,240                                                         | 47,180                                                           | 78,020                                                       | 62,260                                                         |
| 424,000                                       | 127,960                                                              | 54,780                                                        | 84,740                                                          | 63,640                                                         | 76,720                                                           | 71,540                                                       | 65,160                                                         |
| 454,000                                       | 135,520                                                              | 51,120                                                        | 68,620                                                          | 63,260                                                         | 72,240                                                           | 64,620                                                       | 64,960                                                         |
| 402,000                                       | 118,500                                                              | 53,980                                                        | 42,340                                                          | 54,580                                                         | 58,160                                                           | 71,160                                                       | 59,920                                                         |

| <i>midfoot<br/>right:<br/>Contact<br/>time (p)<br/>(%ROP)</i> | <i>midfoot<br/>right:<br/>Maximum<br/>force<br/>(normalized</i> | <i>forefoot<br/>left:<br/>Contact<br/>time (p)<br/>(%ROP)</i> | <i>forefoot<br/>left:<br/>Maximum<br/>force<br/>(normalized</i> | <i>forefoot<br/>right:<br/>Contact<br/>time (p)<br/>(%ROP)</i> | <i>forefoot<br/>right:<br/>Maximum<br/>force<br/>(normalized</i> | <i>Lateral foot<br/>(HT2)left:<br/>Contact<br/>time (p)<br/>(%ROP)</i> | <i>Lateral foot<br/>(HT2)left:<br/>Maximum<br/>force<br/>(normalized</i> |
|---------------------------------------------------------------|-----------------------------------------------------------------|---------------------------------------------------------------|-----------------------------------------------------------------|----------------------------------------------------------------|------------------------------------------------------------------|------------------------------------------------------------------------|--------------------------------------------------------------------------|
| 79,100                                                        | 57,520                                                          | 85,400                                                        | 72,400                                                          | 87,660                                                         | 84,260                                                           | 89,533                                                                 | 60,867                                                                   |
| 81,620                                                        | 52,620                                                          | 85,760                                                        | 70,540                                                          | 89,540                                                         | 76,660                                                           | 99,250                                                                 | 81,100                                                                   |
| 75,700                                                        | 52,240                                                          | 95,140                                                        | 68,260                                                          | 94,420                                                         | 50,720                                                           | 98,567                                                                 | 66,000                                                                   |
| 86,260                                                        | 61,800                                                          | 91,420                                                        | 74,240                                                          | 91,960                                                         | 77,900                                                           | 94,400                                                                 | 62,700                                                                   |
| 75,240                                                        | 47,080                                                          | 85,940                                                        | 50,960                                                          | 91,120                                                         | 55,480                                                           | 89,580                                                                 | 66,600                                                                   |
| 76,760                                                        | 43,500                                                          | 95,420                                                        | 83,100                                                          | 96,900                                                         | 76,000                                                           | 89,875                                                                 | 60,875                                                                   |
| 55,920                                                        | 64,760                                                          | 84,240                                                        | 75,500                                                          | 76,860                                                         | 71,080                                                           | 89,740                                                                 | 51,480                                                                   |
| 72,920                                                        | 60,640                                                          | 84,240                                                        | 50,680                                                          | 77,780                                                         | 49,000                                                           | 83,875                                                                 | 39,550                                                                   |
| 70,020                                                        | 54,400                                                          | 84,000                                                        | 56,260                                                          | 82,880                                                         | 58,320                                                           | 94,460                                                                 | 55,440                                                                   |
| 85,340                                                        | 57,180                                                          | 95,400                                                        | 54,250                                                          | 90,640                                                         | 43,680                                                           | 95,033                                                                 | 70,000                                                                   |
| 78,460                                                        | 61,540                                                          | 84,240                                                        | 39,160                                                          | 85,680                                                         | 50,240                                                           | 92,500                                                                 | 57,880                                                                   |
| 82,220                                                        | 57,440                                                          | 91,820                                                        | 88,820                                                          | 97,760                                                         | 76,820                                                           | 84,025                                                                 | 38,975                                                                   |
| 78,720                                                        | 64,480                                                          | 94,060                                                        | 62,280                                                          | 90,760                                                         | 41,760                                                           | 93,125                                                                 | 47,575                                                                   |
| 67,980                                                        | 62,500                                                          | 89,000                                                        | 77,180                                                          | 86,720                                                         | 63,360                                                           | 96,100                                                                 | 60,140                                                                   |
| 70,660                                                        | 44,000                                                          | 87,500                                                        | 49,580                                                          | 87,300                                                         | 69,680                                                           | 92,220                                                                 | 58,080                                                                   |
| 78,100                                                        | 82,940                                                          | 96,680                                                        | 75,340                                                          | 97,420                                                         | 135,040                                                          | 95,825                                                                 | 119,275                                                                  |
| 80,117                                                        | 51,233                                                          | 88,980                                                        | 64,100                                                          | 83,883                                                         | 48,683                                                           | 96,600                                                                 | 69,067                                                                   |
| 79,360                                                        | 102,500                                                         | 96,940                                                        | 59,480                                                          | 96,200                                                         | 78,300                                                           | 93,967                                                                 | 58,733                                                                   |
| 74,440                                                        | 54,740                                                          | 92,880                                                        | 65,300                                                          | 88,860                                                         | 55,380                                                           | 95,360                                                                 | 39,200                                                                   |
| 81,020                                                        | 52,220                                                          | 96,940                                                        | 64,880                                                          | 98,300                                                         | 81,180                                                           | 87,440                                                                 | 32,040                                                                   |
| 78,960                                                        | 76,320                                                          | 86,683                                                        | 62,417                                                          | 91,580                                                         | 75,600                                                           | 95,960                                                                 | 79,520                                                                   |
| 69,480                                                        | 97,460                                                          | 88,740                                                        | 60,440                                                          | 86,720                                                         | 53,360                                                           | 94,620                                                                 | 60,700                                                                   |
| 75,520                                                        | 53,660                                                          | 94,320                                                        | 69,700                                                          | 96,000                                                         | 83,240                                                           | 94,340                                                                 | 67,120                                                                   |
| 59,600                                                        | 42,200                                                          | 94,020                                                        | 85,780                                                          | 93,980                                                         | 76,300                                                           | 90,800                                                                 | 75,500                                                                   |
| 78,280                                                        | 60,700                                                          | 96,140                                                        | 72,200                                                          | 87,780                                                         | 57,420                                                           | 93,980                                                                 | 54,240                                                                   |
| 71,020                                                        | 69,720                                                          | 93,440                                                        | 74,080                                                          | 90,000                                                         | 73,420                                                           | 95,340                                                                 | 64,180                                                                   |
| 83,000                                                        | 56,080                                                          | 94,520                                                        | 70,280                                                          | 91,600                                                         | 70,260                                                           | 91,900                                                                 | 46,050                                                                   |
| 78,060                                                        | 64,700                                                          | 90,540                                                        | 63,340                                                          | 91,740                                                         | 68,540                                                           | 94,940                                                                 | 67,940                                                                   |
| 79,860                                                        | 71,220                                                          | 90,860                                                        | 75,420                                                          | 96,520                                                         | 86,680                                                           | 93,550                                                                 | 48,925                                                                   |
| 73,100                                                        | 71,400                                                          | 88,860                                                        | 56,280                                                          | 88,700                                                         | 74,160                                                           | 94,100                                                                 | 44,600                                                                   |

| <i>Lateral foot (HT2)right: Contact time (p) (%ROP)</i> | <i>Lateral foot (HT2)right: Maximum force (normalized)</i> | <i>Medial foot (HT2) left: Contact time (p) (%ROP)</i> | <i>Medial foot (HT2) left: Maximum force (normalized)</i> | <i>Medial foot (HT2) right: Contact time (p) (%ROP)</i> | <i>Medial foot (HT2) right: Maximum force (normalized)</i> | <i>left: Foot progression angle (°)</i> | <i>left: Heel width (°)</i> |
|---------------------------------------------------------|------------------------------------------------------------|--------------------------------------------------------|-----------------------------------------------------------|---------------------------------------------------------|------------------------------------------------------------|-----------------------------------------|-----------------------------|
| 81,800                                                  | 29,700                                                     | 100,000                                                | 68,633                                                    | 100,000                                                 | 86,400                                                     | 10,080                                  | 4,000                       |
| 99,100                                                  | 79,100                                                     | 98,850                                                 | 49,900                                                    | 98,800                                                  | 50,100                                                     | 5,900                                   | 3,920                       |
| 92,500                                                  | 55,700                                                     | 99,267                                                 | 60,200                                                    | 99,560                                                  | 54,220                                                     | 15,400                                  | 3,700                       |
| 92,150                                                  | 51,950                                                     | 100,000                                                | 54,500                                                    | 100,000                                                 | 75,150                                                     | 0,040                                   | 4,060                       |
| 92,250                                                  | 70,075                                                     | 98,940                                                 | 81,540                                                    | 98,800                                                  | 73,025                                                     | -2,620                                  | 3,380                       |
| 94,140                                                  | 57,160                                                     | 100,000                                                | 64,475                                                    | 99,100                                                  | 75,060                                                     | 7,480                                   | 3,840                       |
| 99,200                                                  | 75,600                                                     | 99,600                                                 | 90,960                                                    | 100,000                                                 | 76,000                                                     | 5,260                                   | 3,480                       |
| 92,400                                                  | 59,800                                                     | 99,650                                                 | 87,975                                                    | 100,000                                                 | 75,840                                                     | 17,440                                  | 4,240                       |
| 90,450                                                  | 61,250                                                     | 100,000                                                | 67,840                                                    | 100,000                                                 | 70,775                                                     | 5,040                                   | 3,320                       |
| 92,840                                                  | 77,720                                                     | 99,400                                                 | 53,367                                                    | 99,620                                                  | 58,220                                                     | 10,250                                  | 3,750                       |
| 95,580                                                  | 71,460                                                     | 99,040                                                 | 70,800                                                    | 99,600                                                  | 61,840                                                     | 14,280                                  | 3,860                       |
| 96,650                                                  | 61,750                                                     | 100,000                                                | 102,200                                                   | 100,000                                                 | 66,450                                                     | 17,500                                  | 3,880                       |
| 91,080                                                  | 49,140                                                     | 99,475                                                 | 77,500                                                    | 99,540                                                  | 77,780                                                     | 20,380                                  | 4,280                       |
| 93,640                                                  | 62,520                                                     | 100,000                                                | 73,460                                                    | 99,480                                                  | 75,440                                                     | 11,200                                  | 3,840                       |
| 88,725                                                  | 63,150                                                     | 99,740                                                 | 68,620                                                    | 100,000                                                 | 74,275                                                     | 16,720                                  | 3,740                       |
| 96,750                                                  | 124,050                                                    | 99,675                                                 | 78,425                                                    | 100,000                                                 | 87,100                                                     | 8,920                                   | 4,000                       |
| 94,933                                                  | 62,417                                                     | 100,000                                                | 45,200                                                    | 100,000                                                 | 49,400                                                     | 11,060                                  | 3,980                       |
| 92,950                                                  | 75,150                                                     | 100,000                                                | 89,167                                                    | 98,850                                                  | 104,850                                                    | 13,100                                  | 3,760                       |
| 92,640                                                  | 48,660                                                     | 100,000                                                | 89,720                                                    | 99,640                                                  | 80,280                                                     | 13,380                                  | 4,080                       |
| 87,867                                                  | 31,667                                                     | 99,060                                                 | 83,640                                                    | 100,000                                                 | 93,333                                                     | 20,160                                  | 3,200                       |
| 97,200                                                  | 77,667                                                     | 100,000                                                | 57,220                                                    | 100,000                                                 | 59,667                                                     | 20,817                                  | 4,167                       |
| 90,820                                                  | 79,720                                                     | 100,000                                                | 92,540                                                    | 99,540                                                  | 126,580                                                    | 14,200                                  | 3,760                       |
| 95,520                                                  | 84,940                                                     | 99,460                                                 | 78,200                                                    | 99,080                                                  | 67,700                                                     | 12,960                                  | 3,880                       |
| 85,500                                                  | 55,925                                                     | 99,620                                                 | 65,480                                                    | 100,000                                                 | 83,275                                                     | 10,720                                  | 3,320                       |
| 88,233                                                  | 64,333                                                     | 98,920                                                 | 80,460                                                    | 98,667                                                  | 66,000                                                     | 14,160                                  | 4,040                       |
| 95,140                                                  | 64,200                                                     | 100,000                                                | 88,300                                                    | 99,480                                                  | 93,380                                                     | 0,440                                   | 4,060                       |
| 97,475                                                  | 71,600                                                     | 100,000                                                | 84,075                                                    | 100,000                                                 | 53,625                                                     | 14,160                                  | 3,780                       |
| 96,480                                                  | 53,580                                                     | 99,520                                                 | 81,500                                                    | 100,000                                                 | 84,020                                                     | 20,920                                  | 3,800                       |
| 91,450                                                  | 44,400                                                     | 99,450                                                 | 87,000                                                    | 100,000                                                 | 108,850                                                    | 10,700                                  | 4,440                       |
| 97,120                                                  | 47,920                                                     | 100,000                                                | 74,920                                                    | 99,440                                                  | 79,000                                                     | 17,220                                  | 4,120                       |

| <i>left: Forefoot width ( )</i> | <i>left: Foot length ( )</i> | <i>left: Arch index</i> | <i>left: Midfoot width ( )</i> | <i>right: Foot progression angle (°)</i> | <i>right: Heel width ( )</i> | <i>right: Forefoot width ( )</i> | <i>right: Foot length ( )</i> |
|---------------------------------|------------------------------|-------------------------|--------------------------------|------------------------------------------|------------------------------|----------------------------------|-------------------------------|
| 5,860                           | 13,360                       | 0,334                   | 4,280                          | 30,180                                   | 4,280                        | 6,140                            | 13,540                        |
| 5,580                           | 12,860                       | 0,294                   | 3,860                          | 3,600                                    | 3,640                        | 5,180                            | 12,920                        |
| 5,320                           | 12,360                       | 0,336                   | 4,100                          | 29,500                                   | 3,700                        | 4,940                            | 11,800                        |
| 5,760                           | 12,580                       | 0,340                   | 4,840                          | 6,060                                    | 4,140                        | 5,600                            | 12,500                        |
| 4,940                           | 12,100                       | 0,384                   | 3,740                          | 4,540                                    | 3,460                        | 5,200                            | 12,360                        |
| 5,300                           | 12,800                       | 0,318                   | 3,820                          | 7,720                                    | 3,700                        | 5,640                            | 12,700                        |
| 4,980                           | 13,220                       | 0,338                   | 3,540                          | 6,140                                    | 3,740                        | 5,380                            | 13,600                        |
| 5,300                           | 14,460                       | 0,372                   | 4,480                          | 16,620                                   | 4,320                        | 5,680                            | 14,900                        |
| 4,980                           | 12,520                       | 0,358                   | 3,620                          | 18,440                                   | 3,620                        | 5,040                            | 12,040                        |
| 5,125                           | 11,400                       | 0,373                   | 4,050                          | 9,380                                    | 3,600                        | 5,080                            | 12,240                        |
| 4,740                           | 12,740                       | 0,388                   | 3,620                          | 17,220                                   | 3,920                        | 4,820                            | 12,980                        |
| 5,540                           | 13,080                       | 0,328                   | 4,120                          | 11,880                                   | 3,800                        | 5,440                            | 12,560                        |
| 5,720                           | 13,600                       | 0,364                   | 4,580                          | 26,280                                   | 4,300                        | 5,220                            | 14,180                        |
| 5,060                           | 12,840                       | 0,350                   | 3,860                          | 9,840                                    | 3,600                        | 4,900                            | 12,700                        |
| 5,440                           | 13,260                       | 0,342                   | 3,560                          | 19,360                                   | 3,980                        | 5,860                            | 13,300                        |
| 5,520                           | 12,400                       | 0,354                   | 4,000                          | -0,320                                   | 4,180                        | 6,040                            | 12,920                        |
| 5,520                           | 12,720                       | 0,342                   | 3,860                          | 20,183                                   | 3,800                        | 4,950                            | 13,017                        |
| 5,680                           | 11,460                       | 0,374                   | 4,240                          | 12,680                                   | 3,960                        | 6,000                            | 12,760                        |
| 4,400                           | 13,980                       | 0,350                   | 4,100                          | 15,120                                   | 4,180                        | 4,960                            | 14,160                        |
| 5,000                           | 11,680                       | 0,358                   | 3,600                          | 5,000                                    | 3,460                        | 5,100                            | 11,640                        |
| 5,967                           | 14,233                       | 0,357                   | 4,150                          | 5,960                                    | 4,140                        | 6,660                            | 14,220                        |
| 4,700                           | 12,980                       | 0,360                   | 3,780                          | 10,340                                   | 3,840                        | 4,920                            | 12,860                        |
| 5,480                           | 12,520                       | 0,358                   | 3,920                          | 4,120                                    | 3,860                        | 5,900                            | 12,560                        |
| 4,920                           | 11,660                       | 0,336                   | 3,180                          | 10,920                                   | 3,300                        | 4,620                            | 11,360                        |
| 5,820                           | 12,760                       | 0,364                   | 4,320                          | 13,860                                   | 3,720                        | 5,920                            | 13,540                        |
| 4,820                           | 12,740                       | 0,354                   | 4,080                          | 4,440                                    | 3,920                        | 4,980                            | 13,020                        |
| 4,460                           | 11,620                       | 0,342                   | 3,920                          | 12,600                                   | 3,620                        | 5,100                            | 11,920                        |
| 5,020                           | 12,540                       | 0,364                   | 3,920                          | 5,800                                    | 4,120                        | 4,720                            | 11,840                        |
| 5,100                           | 13,520                       | 0,350                   | 4,400                          | 2,880                                    | 4,200                        | 5,820                            | 13,380                        |
| 5,060                           | 13,520                       | 0,394                   | 4,300                          | 14,060                                   | 4,060                        | 5,260                            | 14,140                        |

| <i>right: Arch index</i> | <i>right: Midfoot width ( )</i> | <b>Data collection</b>     | <i>total left: Peak pressure (kPa)</i> | <i>total left: Contact area (2)</i> | <i>total left: Contact time (ms)</i> | <i>total left: Maximum force (normalized to BW)</i> |
|--------------------------|---------------------------------|----------------------------|----------------------------------------|-------------------------------------|--------------------------------------|-----------------------------------------------------|
| 0,318                    | 5,500                           | <b>2nd data collection</b> | 164,000                                | 64,050                              | 404,000                              | 143,180                                             |
| 0,332                    | 3,780                           | <b>2nd data collection</b> | 179,000                                | 54,900                              | 512,000                              | 110,760                                             |
| 0,386                    | 3,760                           | <b>2nd data collection</b> | 145,000                                | 62,200                              | 390,000                              | 116,900                                             |
| 0,338                    | 4,700                           | <b>2nd data collection</b> | 198,000                                | 57,050                              | 402,000                              | 122,400                                             |
| 0,352                    | 3,640                           | <b>2nd data collection</b> | 141,000                                | 53,100                              | 574,000                              | 125,960                                             |
| 0,332                    | 3,860                           | <b>2nd data collection</b> | 190,000                                | 57,100                              | 328,000                              | 161,620                                             |
| 0,366                    | 4,020                           | <b>2nd data collection</b> | 232,000                                | 63,300                              | 478,000                              | 153,040                                             |
| 0,376                    | 4,440                           | <b>2nd data collection</b> | 229,000                                | 69,400                              | 452,000                              | 110,480                                             |
| 0,380                    | 3,860                           | <b>2nd data collection</b> | 204,000                                | 52,250                              | 366,000                              | 143,120                                             |
| 0,378                    | 3,540                           | <b>2nd data collection</b> | 224,000                                | 54,200                              | 360,000                              | 173,740                                             |
| 0,384                    | 3,720                           | <b>2nd data collection</b> | 326,000                                | 60,050                              | 326,000                              | 159,520                                             |
| 0,314                    | 3,920                           | <b>2nd data collection</b> | 107,000                                | 56,050                              | 478,000                              | 120,920                                             |
| 0,388                    | 4,520                           | <b>2nd data collection</b> | 157,000                                | 68,150                              | 544,000                              | 110,560                                             |
| 0,358                    | 3,760                           | <b>2nd data collection</b> | 168,000                                | 55,250                              | 258,000                              | 179,940                                             |
| 0,336                    | 4,200                           | <b>2nd data collection</b> | 134,000                                | 59,700                              | 580,000                              | 125,420                                             |
| 0,328                    | 4,760                           | <b>2nd data collection</b> | 147,000                                | 55,850                              | 326,000                              | 200,680                                             |
| 0,383                    | 3,817                           | <b>2nd data collection</b> | 115,000                                | 61,700                              | 458,000                              | 125,480                                             |
| 0,350                    | 4,940                           | <b>2nd data collection</b> | 103,750                                | 60,188                              | 590,000                              | 117,275                                             |
| 0,374                    | 4,300                           | <b>2nd data collection</b> | 207,000                                | 65,150                              | 436,000                              | 130,460                                             |
| 0,332                    | 4,040                           | <b>2nd data collection</b> | 213,000                                | 50,400                              | 416,000                              | 123,240                                             |
| 0,326                    | 4,640                           | <b>2nd data collection</b> | 150,000                                | 78,750                              | 486,000                              | 140,240                                             |
| 0,386                    | 4,080                           | <b>2nd data collection</b> | 426,000                                | 59,350                              | 284,000                              | 197,720                                             |
| 0,338                    | 3,900                           | <b>2nd data collection</b> | 116,000                                | 61,700                              | 628,000                              | 116,140                                             |
| 0,344                    | 3,480                           | <b>2nd data collection</b> | 116,000                                | 46,450                              | 500,000                              | 116,760                                             |
| 0,382                    | 4,240                           | <b>2nd data collection</b> | 143,000                                | 66,500                              | 244,000                              | 212,880                                             |
| 0,352                    | 3,900                           | <b>2nd data collection</b> | 190,000                                | 61,800                              | 194,000                              | 192,900                                             |
| 0,328                    | 3,600                           | <b>2nd data collection</b> | 190,000                                | 61,650                              | 442,000                              | 146,720                                             |
| 0,362                    | 3,940                           | <b>2nd data collection</b> | 143,000                                | 55,950                              | 378,000                              | 147,920                                             |
| 0,336                    | 4,520                           | <b>2nd data collection</b> | 181,000                                | 59,700                              | 522,000                              | 112,560                                             |
| 0,372                    | 4,260                           | <b>2nd data collection</b> | 149,000                                | 66,200                              | 262,000                              | 207,440                                             |

| <i>total right:<br/>Peak<br/>pressure<br/>(kPa)</i> | <i>total right:<br/>Contact<br/>area (2)</i> | <i>total right:<br/>Contact<br/>time (ms)</i> | <i>total right:<br/>Maximum<br/>force<br/>(normalized<br/>to BW)</i> | <i>hindfoot<br/>left:<br/>Contact<br/>time (p)<br/>(%ROP)</i> | <i>hindfoot<br/>left:<br/>Maximum<br/>force<br/>(normalized</i> | <i>hindfoot<br/>right:<br/>Contact<br/>time (p)<br/>(%ROP)</i> | <i>hindfoot<br/>right:<br/>Maximum<br/>force<br/>(normalized</i> |
|-----------------------------------------------------|----------------------------------------------|-----------------------------------------------|----------------------------------------------------------------------|---------------------------------------------------------------|-----------------------------------------------------------------|----------------------------------------------------------------|------------------------------------------------------------------|
| 144,000                                             | 63,400                                       | 442,000                                       | 136,680                                                              | 56,700                                                        | 71,140                                                          | 52,500                                                         | 56,000                                                           |
| 150,000                                             | 55,650                                       | 534,000                                       | 115,000                                                              | 63,000                                                        | 65,280                                                          | 60,180                                                         | 66,880                                                           |
| 177,000                                             | 60,850                                       | 382,000                                       | 135,300                                                              | 58,680                                                        | 63,860                                                          | 66,960                                                         | 64,320                                                           |
| 169,000                                             | 56,550                                       | 432,000                                       | 135,880                                                              | 65,820                                                        | 71,680                                                          | 58,420                                                         | 67,220                                                           |
| 153,000                                             | 48,300                                       | 482,000                                       | 115,360                                                              | 45,200                                                        | 58,420                                                          | 35,080                                                         | 39,340                                                           |
| 270,000                                             | 59,100                                       | 298,000                                       | 175,740                                                              | 42,520                                                        | 90,980                                                          | 48,680                                                         | 122,500                                                          |
| 215,000                                             | 65,250                                       | 280,000                                       | 211,660                                                              | 55,140                                                        | 78,820                                                          | 39,320                                                         | 102,840                                                          |
| 155,000                                             | 68,700                                       | 454,000                                       | 113,880                                                              | 62,340                                                        | 58,580                                                          | 63,580                                                         | 54,240                                                           |
| 185,000                                             | 52,050                                       | 326,000                                       | 142,580                                                              | 55,060                                                        | 83,940                                                          | 49,660                                                         | 80,820                                                           |
| 274,000                                             | 56,050                                       | 294,000                                       | 183,180                                                              | 50,740                                                        | 97,900                                                          | 49,560                                                         | 113,720                                                          |
| 324,000                                             | 57,150                                       | 288,000                                       | 166,300                                                              | 50,620                                                        | 111,140                                                         | 48,100                                                         | 112,740                                                          |
| 116,000                                             | 53,600                                       | 510,000                                       | 125,820                                                              | 58,100                                                        | 50,460                                                          | 51,200                                                         | 55,280                                                           |
| 123,000                                             | 68,850                                       | 570,000                                       | 110,880                                                              | 48,340                                                        | 57,580                                                          | 48,680                                                         | 55,420                                                           |
| 162,000                                             | 60,450                                       | 224,000                                       | 169,720                                                              | 54,520                                                        | 84,000                                                          | 42,860                                                         | 74,580                                                           |
| 174,000                                             | 63,850                                       | 474,000                                       | 132,640                                                              | 57,900                                                        | 61,920                                                          | 46,880                                                         | 74,100                                                           |
| 145,000                                             | 60,850                                       | 322,000                                       | 191,040                                                              | 36,560                                                        | 72,740                                                          | 33,280                                                         | 75,280                                                           |
| 123,000                                             | 62,100                                       | 474,000                                       | 118,500                                                              | 55,960                                                        | 62,520                                                          | 55,880                                                         | 64,820                                                           |
| 121,667                                             | 60,917                                       | 470,000                                       | 130,967                                                              | 53,475                                                        | 34,550                                                          | 55,000                                                         | 46,800                                                           |
| 271,000                                             | 67,050                                       | 408,000                                       | 134,620                                                              | 58,860                                                        | 71,680                                                          | 53,080                                                         | 70,420                                                           |
| 197,000                                             | 51,100                                       | 386,000                                       | 124,800                                                              | 51,000                                                        | 75,100                                                          | 46,300                                                         | 70,080                                                           |
| 178,000                                             | 76,000                                       | 468,000                                       | 153,260                                                              | 46,060                                                        | 52,560                                                          | 31,820                                                         | 66,840                                                           |
| 353,000                                             | 59,200                                       | 290,000                                       | 210,980                                                              | 46,640                                                        | 140,880                                                         | 47,080                                                         | 131,980                                                          |
| 135,000                                             | 58,450                                       | 624,000                                       | 109,020                                                              | 50,620                                                        | 46,960                                                          | 64,220                                                         | 48,820                                                           |
| 99,000                                              | 47,600                                       | 480,000                                       | 109,140                                                              | 50,780                                                        | 52,480                                                          | 52,060                                                         | 40,680                                                           |
| 167,000                                             | 66,200                                       | 262,000                                       | 202,920                                                              | 32,980                                                        | 82,220                                                          | 30,660                                                         | 77,520                                                           |
| 210,000                                             | 63,000                                       | 198,000                                       | 226,640                                                              | 43,480                                                        | 91,300                                                          | 45,520                                                         | 94,780                                                           |
| 158,000                                             | 59,950                                       | 388,000                                       | 133,240                                                              | 47,440                                                        | 78,320                                                          | 48,920                                                         | 62,120                                                           |
| 126,000                                             | 55,800                                       | 448,000                                       | 144,920                                                              | 44,880                                                        | 47,380                                                          | 47,440                                                         | 53,700                                                           |
| 157,000                                             | 59,550                                       | 462,000                                       | 134,880                                                              | 66,680                                                        | 59,020                                                          | 57,920                                                         | 60,000                                                           |
| 137,000                                             | 70,400                                       | 244,000                                       | 215,040                                                              | 34,140                                                        | 54,480                                                          | 32,480                                                         | 60,680                                                           |

| <i>midfoot left: Contact time (p) (%ROP)</i> | <i>midfoot left: Maximum force (normalized</i> | <i>midfoot right: Contact time (p) (%ROP)</i> | <i>midfoot right: Maximum force (normalized</i> | <i>forefoot left: Contact time (p) (%ROP)</i> | <i>forefoot left: Maximum force (normalized</i> | <i>forefoot right: Contact time (p) (%ROP)</i> | <i>forefoot right: Maximum force (normalized</i> |
|----------------------------------------------|------------------------------------------------|-----------------------------------------------|-------------------------------------------------|-----------------------------------------------|-------------------------------------------------|------------------------------------------------|--------------------------------------------------|
| 69,940                                       | 56,460                                         | 63,920                                        | 61,300                                          | 94,060                                        | 77,440                                          | 94,340                                         | 76,360                                           |
| 75,360                                       | 48,180                                         | 72,420                                        | 52,380                                          | 81,420                                        | 79,020                                          | 79,560                                         | 86,840                                           |
| 81,320                                       | 55,920                                         | 76,460                                        | 62,420                                          | 88,600                                        | 75,040                                          | 96,480                                         | 81,840                                           |
| 79,460                                       | 56,800                                         | 77,120                                        | 65,120                                          | 81,200                                        | 85,120                                          | 91,340                                         | 91,120                                           |
| 69,860                                       | 44,180                                         | 57,040                                        | 40,020                                          | 91,840                                        | 77,380                                          | 89,680                                         | 80,640                                           |
| 56,920                                       | 46,280                                         | 57,060                                        | 54,260                                          | 92,820                                        | 85,080                                          | 82,260                                         | 73,440                                           |
| 59,120                                       | 64,480                                         | 49,040                                        | 101,600                                         | 76,280                                        | 79,620                                          | 76,940                                         | 82,540                                           |
| 69,200                                       | 40,160                                         | 73,500                                        | 45,640                                          | 82,840                                        | 63,420                                          | 82,820                                         | 52,760                                           |
| 66,620                                       | 65,200                                         | 65,220                                        | 62,840                                          | 87,300                                        | 85,320                                          | 90,040                                         | 93,080                                           |
| 65,160                                       | 66,280                                         | 60,980                                        | 70,340                                          | 82,200                                        | 72,840                                          | 75,420                                         | 67,420                                           |
| 61,080                                       | 67,040                                         | 58,940                                        | 71,560                                          | 81,680                                        | 68,960                                          | 81,120                                         | 79,200                                           |
| 80,820                                       | 48,800                                         | 75,660                                        | 47,880                                          | 93,840                                        | 89,300                                          | 97,240                                         | 96,460                                           |
| 70,900                                       | 51,580                                         | 71,300                                        | 49,780                                          | 85,980                                        | 81,540                                          | 88,540                                         | 85,920                                           |
| 65,800                                       | 76,400                                         | 56,860                                        | 71,220                                          | 85,860                                        | 89,120                                          | 88,120                                         | 90,080                                           |
| 73,940                                       | 43,680                                         | 62,360                                        | 56,020                                          | 89,120                                        | 75,500                                          | 84,180                                         | 80,960                                           |
| 46,520                                       | 47,240                                         | 59,400                                        | 51,240                                          | 95,540                                        | 92,560                                          | 89,360                                         | 90,280                                           |
| 75,060                                       | 53,960                                         | 72,180                                        | 52,760                                          | 87,800                                        | 85,020                                          | 81,960                                         | 88,040                                           |
| 76,300                                       | 61,475                                         | 75,700                                        | 71,367                                          | 86,325                                        | 78,975                                          | 87,733                                         | 66,733                                           |
| 62,900                                       | 61,980                                         | 59,920                                        | 63,720                                          | 78,740                                        | 76,160                                          | 81,920                                         | 77,760                                           |
| 64,660                                       | 49,280                                         | 69,980                                        | 57,440                                          | 89,940                                        | 92,920                                          | 90,860                                         | 87,280                                           |
| 62,800                                       | 58,200                                         | 57,980                                        | 58,900                                          | 87,520                                        | 86,820                                          | 90,980                                         | 85,940                                           |
| 52,000                                       | 76,140                                         | 49,180                                        | 66,400                                          | 74,320                                        | 87,180                                          | 73,560                                         | 59,260                                           |
| 72,620                                       | 48,320                                         | 80,960                                        | 46,760                                          | 93,180                                        | 83,020                                          | 88,500                                         | 85,000                                           |
| 73,700                                       | 41,360                                         | 79,980                                        | 46,100                                          | 92,940                                        | 90,640                                          | 93,440                                         | 84,180                                           |
| 67,060                                       | 106,140                                        | 62,160                                        | 96,180                                          | 88,740                                        | 89,680                                          | 89,720                                         | 92,080                                           |
| 63,360                                       | 68,820                                         | 55,800                                        | 81,560                                          | 95,600                                        | 94,020                                          | 91,060                                         | 87,320                                           |
| 60,680                                       | 64,120                                         | 62,840                                        | 54,680                                          | 86,880                                        | 92,340                                          | 87,060                                         | 85,580                                           |
| 68,720                                       | 58,660                                         | 72,380                                        | 57,440                                          | 95,300                                        | 84,240                                          | 95,480                                         | 97,540                                           |
| 72,220                                       | 39,820                                         | 70,240                                        | 57,200                                          | 85,440                                        | 85,740                                          | 88,420                                         | 94,320                                           |
| 50,720                                       | 110,540                                        | 55,300                                        | 110,720                                         | 86,940                                        | 87,920                                          | 89,180                                         | 92,840                                           |

| <i>Lateral foot (HT2)left: Contact time (p) (%ROP)</i> | <i>Lateral foot (HT2)left: Maximum force (normalized)</i> | <i>Lateral foot (HT2)right: Contact time (p) (%ROP)</i> | <i>Lateral foot (HT2)right: Maximum force (normalized)</i> | <i>Medial foot (HT2) left: Contact time (p) (%ROP)</i> | <i>Medial foot (HT2) left: Maximum force (normalized)</i> | <i>Medial foot (HT2) right: Contact time (p) (%ROP)</i> | <i>Medial foot (HT2) right: Maximum force (normalized)</i> |
|--------------------------------------------------------|-----------------------------------------------------------|---------------------------------------------------------|------------------------------------------------------------|--------------------------------------------------------|-----------------------------------------------------------|---------------------------------------------------------|------------------------------------------------------------|
| 95,300                                                 | 69,800                                                    | 97,000                                                  | 79,000                                                     | 100,000                                                | 95,850                                                    | 100,000                                                 | 90,400                                                     |
| 96,075                                                 | 51,700                                                    | 93,867                                                  | 61,700                                                     | 99,600                                                 | 77,575                                                    | 99,433                                                  | 72,833                                                     |
| 96,360                                                 | 70,100                                                    | 93,160                                                  | 54,220                                                     | 100,000                                                | 54,020                                                    | 100,000                                                 | 85,740                                                     |
| 95,767                                                 | 46,833                                                    | 95,033                                                  | 54,133                                                     | 100,000                                                | 80,733                                                    | 100,000                                                 | 85,700                                                     |
| 96,740                                                 | 71,260                                                    | 94,980                                                  | 65,940                                                     | 99,160                                                 | 69,760                                                    | 99,540                                                  | 60,800                                                     |
| 94,250                                                 | 90,575                                                    | 93,640                                                  | 85,060                                                     | 100,000                                                | 91,350                                                    | 100,000                                                 | 98,300                                                     |
| 93,280                                                 | 69,400                                                    | 92,100                                                  | 89,875                                                     | 99,360                                                 | 86,680                                                    | 99,075                                                  | 121,175                                                    |
| 91,780                                                 | 44,760                                                    | 94,260                                                  | 52,200                                                     | 100,000                                                | 72,000                                                    | 100,000                                                 | 63,860                                                     |
| 92,650                                                 | 66,150                                                    | 94,550                                                  | 85,625                                                     | 99,100                                                 | 80,750                                                    | 100,000                                                 | 62,900                                                     |
| 94,700                                                 | 97,180                                                    | 91,880                                                  | 102,940                                                    | 100,000                                                | 82,480                                                    | 100,000                                                 | 86,440                                                     |
| 96,280                                                 | 82,480                                                    | 97,200                                                  | 92,680                                                     | 100,000                                                | 86,800                                                    | 100,000                                                 | 79,840                                                     |
| 92,867                                                 | 59,300                                                    | 99,400                                                  | 82,967                                                     | 100,000                                                | 78,067                                                    | 98,800                                                  | 44,833                                                     |
| 94,400                                                 | 59,767                                                    | 96,180                                                  | 60,160                                                     | 100,000                                                | 63,833                                                    | 99,640                                                  | 67,080                                                     |
| 91,780                                                 | 87,800                                                    | 96,320                                                  | 78,240                                                     | 100,000                                                | 96,740                                                    | 99,000                                                  | 92,260                                                     |
| 98,040                                                 | 74,560                                                    | 96,160                                                  | 80,780                                                     | 100,000                                                | 61,520                                                    | 99,560                                                  | 67,180                                                     |
| 94,075                                                 | 83,375                                                    | 94,920                                                  | 110,160                                                    | 100,000                                                | 130,775                                                   | 100,000                                                 | 90,060                                                     |
| 99,080                                                 | 87,000                                                    | 95,740                                                  | 71,380                                                     | 98,680                                                 | 50,100                                                    | 100,000                                                 | 60,340                                                     |
| 97,275                                                 | 69,775                                                    | 95,267                                                  | 69,700                                                     | 98,125                                                 | 55,050                                                    | 98,200                                                  | 63,833                                                     |
| 95,140                                                 | 40,160                                                    | 95,740                                                  | 52,000                                                     | 98,640                                                 | 96,340                                                    | 100,000                                                 | 83,980                                                     |
| 91,240                                                 | 45,060                                                    | 92,900                                                  | 37,400                                                     | 100,000                                                | 96,980                                                    | 100,000                                                 | 93,000                                                     |
| 96,600                                                 | 67,500                                                    | 96,600                                                  | 72,220                                                     | 100,000                                                | 75,260                                                    | 99,580                                                  | 82,480                                                     |
| 88,140                                                 | 98,540                                                    | 85,520                                                  | 104,540                                                    | 98,600                                                 | 102,160                                                   | 100,000                                                 | 115,060                                                    |
| 98,800                                                 | 82,150                                                    | 97,475                                                  | 71,475                                                     | 100,000                                                | 47,250                                                    | 100,000                                                 | 45,525                                                     |
| 100,000                                                | 78,300                                                    | 97,420                                                  | 83,120                                                     | 100,000                                                | 43,800                                                    | 100,000                                                 | 38,520                                                     |
| 90,540                                                 | 115,840                                                   | 92,660                                                  | 101,620                                                    | 97,740                                                 | 112,480                                                   | 96,780                                                  | 112,040                                                    |
| 97,275                                                 | 99,175                                                    | 95,100                                                  | 96,475                                                     | 98,600                                                 | 109,600                                                   | 98,750                                                  | 137,650                                                    |
| 94,700                                                 | 64,840                                                    | 95,860                                                  | 67,580                                                     | 99,180                                                 | 88,580                                                    | 98,920                                                  | 72,380                                                     |
| 95,250                                                 | 71,800                                                    | 95,200                                                  | 60,050                                                     | 100,000                                                | 91,300                                                    | 99,250                                                  | 72,150                                                     |
| 95,920                                                 | 51,760                                                    | 95,820                                                  | 63,100                                                     | 100,000                                                | 79,320                                                    | 98,720                                                  | 77,400                                                     |
| 93,120                                                 | 69,300                                                    | 94,600                                                  | 80,360                                                     | 99,040                                                 | 141,880                                                   | 99,260                                                  | 142,800                                                    |

| <i>left: Foot progression angle (°)</i> | <i>left: Heel width (°)</i> | <i>left: Forefoot width (°)</i> | <i>left: Foot length (°)</i> | <i>left: Arch index</i> | <i>left: Midfoot width (°)</i> | <i>right: Foot progression angle (°)</i> | <i>right: Heel width (°)</i> |
|-----------------------------------------|-----------------------------|---------------------------------|------------------------------|-------------------------|--------------------------------|------------------------------------------|------------------------------|
| 12,340                                  | 4,240                       | 6,520                           | 14,300                       | 0,320                   | 5,100                          | 9,900                                    | 4,240                        |
| 6,120                                   | 3,820                       | 5,860                           | 14,520                       | 0,320                   | 3,820                          | 8,540                                    | 3,700                        |
| 5,820                                   | 4,260                       | 6,080                           | 14,520                       | 0,334                   | 4,140                          | 10,220                                   | 4,500                        |
| -4,360                                  | 4,040                       | 5,800                           | 13,760                       | 0,318                   | 4,360                          | 7,160                                    | 3,940                        |
| -1,180                                  | 3,660                       | 5,820                           | 13,840                       | 0,332                   | 3,360                          | -5,040                                   | 3,320                        |
| 4,360                                   | 3,880                       | 6,540                           | 14,000                       | 0,292                   | 3,720                          | 9,480                                    | 4,000                        |
| 3,180                                   | 4,000                       | 6,440                           | 14,840                       | 0,344                   | 4,780                          | 8,320                                    | 4,280                        |
| 0,860                                   | 4,400                       | 5,800                           | 15,780                       | 0,342                   | 4,420                          | 13,820                                   | 4,140                        |
| -0,040                                  | 3,700                       | 5,680                           | 13,200                       | 0,296                   | 3,460                          | 9,260                                    | 3,780                        |
| 8,720                                   | 3,580                       | 5,580                           | 14,280                       | 0,342                   | 3,300                          | 14,660                                   | 3,780                        |
| 5,580                                   | 4,140                       | 5,500                           | 14,560                       | 0,348                   | 3,920                          | 6,180                                    | 3,680                        |
| 3,260                                   | 4,380                       | 6,120                           | 13,580                       | 0,316                   | 3,660                          | 4,880                                    | 3,880                        |
| 16,540                                  | 3,960                       | 6,740                           | 16,240                       | 0,336                   | 4,380                          | 20,020                                   | 4,060                        |
| 3,900                                   | 3,820                       | 5,680                           | 13,680                       | 0,332                   | 4,040                          | 8,160                                    | 3,720                        |
| 3,600                                   | 3,840                       | 6,140                           | 14,860                       | 0,294                   | 3,120                          | 8,220                                    | 3,980                        |
| 6,640                                   | 4,040                       | 6,200                           | 14,180                       | 0,292                   | 3,580                          | 2,220                                    | 4,060                        |
| 0,520                                   | 4,240                       | 6,160                           | 14,960                       | 0,298                   | 3,520                          | 9,300                                    | 3,980                        |
| 0,950                                   | 3,900                       | 6,225                           | 13,650                       | 0,365                   | 4,525                          | 5,233                                    | 4,300                        |
| 7,780                                   | 4,820                       | 5,140                           | 15,620                       | 0,354                   | 4,420                          | 12,140                                   | 4,360                        |
| 5,840                                   | 3,560                       | 5,720                           | 13,320                       | 0,320                   | 3,680                          | 6,740                                    | 3,480                        |
| 7,360                                   | 4,500                       | 7,240                           | 16,140                       | 0,350                   | 5,120                          | 8,940                                    | 4,460                        |
| 9,100                                   | 4,040                       | 5,980                           | 15,260                       | 0,306                   | 3,440                          | 10,320                                   | 3,980                        |
| 0,540                                   | 4,060                       | 6,580                           | 14,460                       | 0,292                   | 3,420                          | -7,760                                   | 4,060                        |
| 4,020                                   | 3,360                       | 5,880                           | 12,700                       | 0,278                   | 3,200                          | 2,560                                    | 3,780                        |
| 7,800                                   | 4,480                       | 6,520                           | 14,540                       | 0,360                   | 5,000                          | 11,560                                   | 4,260                        |
| 11,280                                  | 4,500                       | 5,940                           | 14,080                       | 0,332                   | 4,320                          | 8,480                                    | 4,740                        |
| 1,280                                   | 4,080                       | 5,660                           | 14,680                       | 0,336                   | 4,260                          | 4,380                                    | 4,000                        |
| 10,340                                  | 4,120                       | 5,840                           | 13,340                       | 0,300                   | 4,480                          | 8,860                                    | 4,100                        |
| 4,560                                   | 4,200                       | 5,720                           | 14,960                       | 0,312                   | 3,780                          | -0,980                                   | 4,100                        |
| 9,800                                   | 4,800                       | 6,080                           | 14,420                       | 0,386                   | 4,900                          | 7,940                                    | 5,020                        |

| <i>right:</i><br>Forefoot<br>width ( ) | <i>right:</i> Foot<br>length ( ) | <i>right:</i> Arch<br>index | <i>right:</i><br>Midfoot<br>width ( ) |
|----------------------------------------|----------------------------------|-----------------------------|---------------------------------------|
| 6,040                                  | 14,920                           | 0,318                       | 4,880                                 |
| 6,000                                  | 14,440                           | 0,316                       | 3,880                                 |
| 5,780                                  | 13,960                           | 0,324                       | 4,540                                 |
| 5,840                                  | 13,940                           | 0,324                       | 4,420                                 |
| 5,540                                  | 13,540                           | 0,318                       | 2,900                                 |
| 5,940                                  | 14,220                           | 0,324                       | 3,400                                 |
| 5,600                                  | 14,520                           | 0,374                       | 4,560                                 |
| 6,020                                  | 16,440                           | 0,362                       | 4,480                                 |
| 6,060                                  | 13,080                           | 0,294                       | 3,600                                 |
| 5,520                                  | 14,680                           | 0,356                       | 3,420                                 |
| 6,040                                  | 14,260                           | 0,324                       | 3,420                                 |
| 6,200                                  | 13,660                           | 0,284                       | 3,480                                 |
| 6,800                                  | 15,900                           | 0,326                       | 4,140                                 |
| 6,080                                  | 13,800                           | 0,334                       | 4,280                                 |
| 6,280                                  | 15,460                           | 0,296                       | 3,380                                 |
| 6,400                                  | 14,860                           | 0,298                       | 4,040                                 |
| 6,160                                  | 15,380                           | 0,306                       | 3,580                                 |
| 5,833                                  | 14,100                           | 0,367                       | 4,567                                 |
| 5,260                                  | 15,680                           | 0,372                       | 4,440                                 |
| 5,740                                  | 13,460                           | 0,322                       | 3,860                                 |
| 6,560                                  | 15,760                           | 0,346                       | 4,800                                 |
| 5,540                                  | 15,140                           | 0,318                       | 3,740                                 |
| 6,900                                  | 14,220                           | 0,282                       | 3,900                                 |
| 5,380                                  | 13,360                           | 0,328                       | 3,360                                 |
| 6,600                                  | 14,520                           | 0,364                       | 4,760                                 |
| 5,860                                  | 13,960                           | 0,354                       | 4,880                                 |
| 5,760                                  | 14,680                           | 0,328                       | 3,860                                 |
| 5,740                                  | 13,680                           | 0,294                       | 3,980                                 |
| 6,080                                  | 14,940                           | 0,326                       | 4,320                                 |
| 6,380                                  | 14,300                           | 0,380                       | 5,340                                 |
